# Supplementary material for: Identifying Bacterial Airways Infection in Stable Severe Asthma Using Oxford Nanopore Sequencing Technologies
Source: PubMed Central journal article supplement (PMC9045196; doi:10.1128/spectrum.02279-21), 2022-03-24
Supplement: spectrum02279-21_supp_2_seq15.pdf [file spectrum02279-21_supp_2_seq15.pdf]

## Identifying Bacterial Airways Infection in Stable Severe Asthma Using Oxford Nanopore Sequencing Technologies: Supplementary Material

**Table S1:** Clinical characteristics and airway inflammatory cell parameters of healthy control

| <b>Characteristic</b>                   | <b>Healthy control</b> |
|-----------------------------------------|------------------------|
| Sex                                     | Female                 |
| Age (years)                             | 28                     |
| BMI (kg/m <sup>2</sup> )                | 20.7                   |
| Presence of atopy                       | Nil                    |
| Smoking history                         | Ex-smoker              |
| Pack years                              | 10                     |
| FEV1 (L)                                | 2.36                   |
| FVC (L)                                 | 2.78                   |
| FEV1/FVC                                | 0.83                   |
| FeNO (ppb)                              | 23                     |
| Blood eosinophils (x10 <sup>9</sup> /L) | 0.16                   |
| Sputum eosinophils (%)                  | 0                      |
| Sputum neutrophils (%)                  | 53.2                   |

**Table S2:** Sputum culture results; gold standard culture of induced sputum plug samples and speciation with MALDI-TOF

| PID  | Bacterial species identified on culture                                                                                                                                                              |
|------|------------------------------------------------------------------------------------------------------------------------------------------------------------------------------------------------------|
| 1054 | <i>Haemophilus influenzae</i> , <i>Streptococcus pneumoniae</i> , <i>Streptococcus parasanguinis</i> , 2 unclassified species*                                                                       |
| 278  | <i>Haemophilus influenzae</i> , <i>Streptococcus mitis</i> , <i>Streptococcus vestibularis</i>                                                                                                       |
| 133  | <i>Haemophilus influenzae</i> , <i>Streptococcus pneumoniae</i> , <i>Streptococcus parasanguinis</i>                                                                                                 |
| 297  | <i>Haemophilus influenzae</i> , <i>Streptococcus pneumoniae</i> , <i>Streptococcus vestibularis</i> , 2 unclassified species*                                                                        |
| 288  | <i>Haemophilus influenzae</i> , <i>Rothia mucilaginosa</i>                                                                                                                                           |
| 29   | <i>Haemophilus influenzae</i> , <i>Streptococcus pneumoniae</i> , <i>Streptococcus salivarius</i> , <i>Rothia mucilaginosa</i>                                                                       |
| 214  | <i>Haemophilus influenzae</i> (clinical laboratory result)                                                                                                                                           |
| 1049 | <i>Streptococcus pneumoniae</i> , <i>Streptococcus agalactiae</i> , <i>Neisseria macacae</i> , <i>Streptococcus vestibularis</i> , <i>Streptococcus salivarius</i> , <i>Streptococcus oralis</i>     |
| 235  | Mixed upper respiratory tract flora (clinical laboratory result)                                                                                                                                     |
| 306  | <i>Streptococcus salivarius</i> , <i>Streptococcus parasanguinis</i> , <i>Rothia dentocarinosa</i> , 2 unclassified species*                                                                         |
| 187  | Mixed upper respiratory tract flora (clinical laboratory result)                                                                                                                                     |
| 1052 | <i>Rothia mucilaginosa</i> , <i>Streptococcus parasanguinis</i>                                                                                                                                      |
| 294  | <i>Streptococcus vestibularis</i> , <i>Rothia mucilaginosa</i> , <i>Neisseria subflava</i> , <i>Streptococcus salivarius</i> , <i>Streptococcus parasanguinis</i> , <i>Neisseria flavescens</i>      |
| 1055 | <i>Rothia mucilaginosa</i> , <i>Neisseria perflava</i> , <i>Streptococcus vestibularis</i> , <i>Streptococcus parasanguinis</i> , <i>Streptococcus salivarius</i>                                    |
| 1053 | <i>Streptococcus mitis</i> , <i>Streptococcus sanguinis</i> , <i>Streptococcus infantis</i>                                                                                                          |
| 1041 | <i>Streptococcus pneumoniae</i> , <i>Streptococcus vestibularis</i> , <i>Rothia mucilaginosa</i> , <i>Streptococcus oralis</i>                                                                       |
| 5    | <i>Rothia mucilaginosa</i> , <i>Streptococcus parasanguinis</i> , <i>Streptococcus salivarius</i> , <i>Neisseria flavescens</i>                                                                      |
| 275  | <i>Streptococcus pneumoniae</i> , <i>Streptococcus mitis</i> , <i>Streptococcus anginosus</i> , 4 unclassified species*                                                                              |
| 315  | <i>Streptococcus mitis</i> , <i>Streptococcus vestibularis</i> , <i>Neisseria flavescens</i> , 3 unclassified species*                                                                               |
| 1060 | <i>Streptococcus salivarius</i> , <i>Streptococcus parasanguinis</i> , <i>Streptococcus mitis</i>                                                                                                    |
| 279  | <i>Streptococcus mitis</i> , <i>Streptococcus parasanguinis</i> , <i>Rothia dentocarinosa</i> , <i>Streptococcus vestibularis</i> , <i>Streptococcus salivarius</i> , <i>Streptococcus anginosus</i> |
| 295  | <i>Streptococcus salivarius</i> , <i>Rothia mucilaginosa</i> , <i>Streptococcus mitis</i> , <i>Streptococcus vestibularis</i>                                                                        |
| 1058 | <i>Neisseria subflava</i> , <i>Neisseria flavescens</i> , <i>Streptococcus salivarius</i> , <i>Rothia dentocarinosa</i>                                                                              |

\*Unclassified result on MALDI-TOF (including following formic acid treatment)

**Figure S1:** Comparison of methods for depletion of human DNA with differential centrifugation and NEBNext microbiome DNA enrichment kit (n=2); (a) Percentage of total unfiltered reads by parameter detected using each DNA extraction method (mean, SD), (b) Total bacterial load measured by bacterial 16S RT-qPCR (mean, SD)

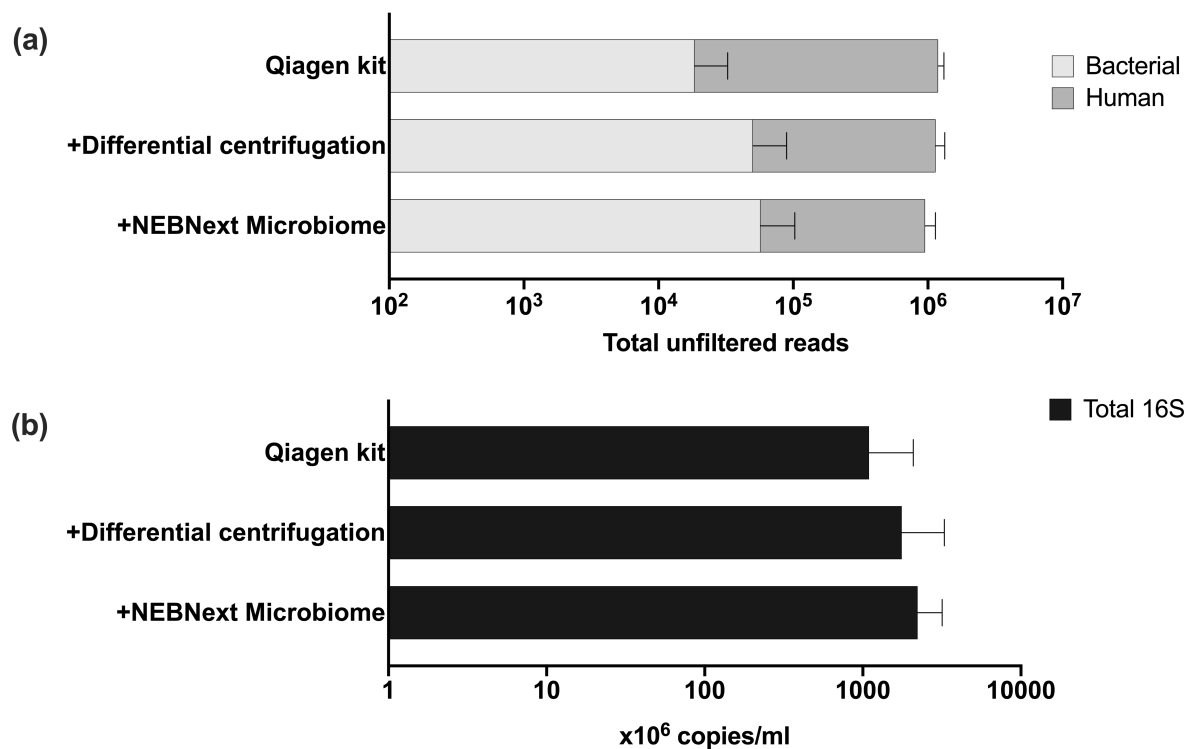

**Figure S2:** Total number of bacterial and human reads with (a) ONT and (b) Illumina MiSeq upon mapping all metagenomic sequencing reads. Total human reads are a sum of human reads removed following mapping to the human genome and residual reads subsequently detected by Centrifuge. This is plotted with the number human reads removed after mapping to the human genome in (c) and (d).

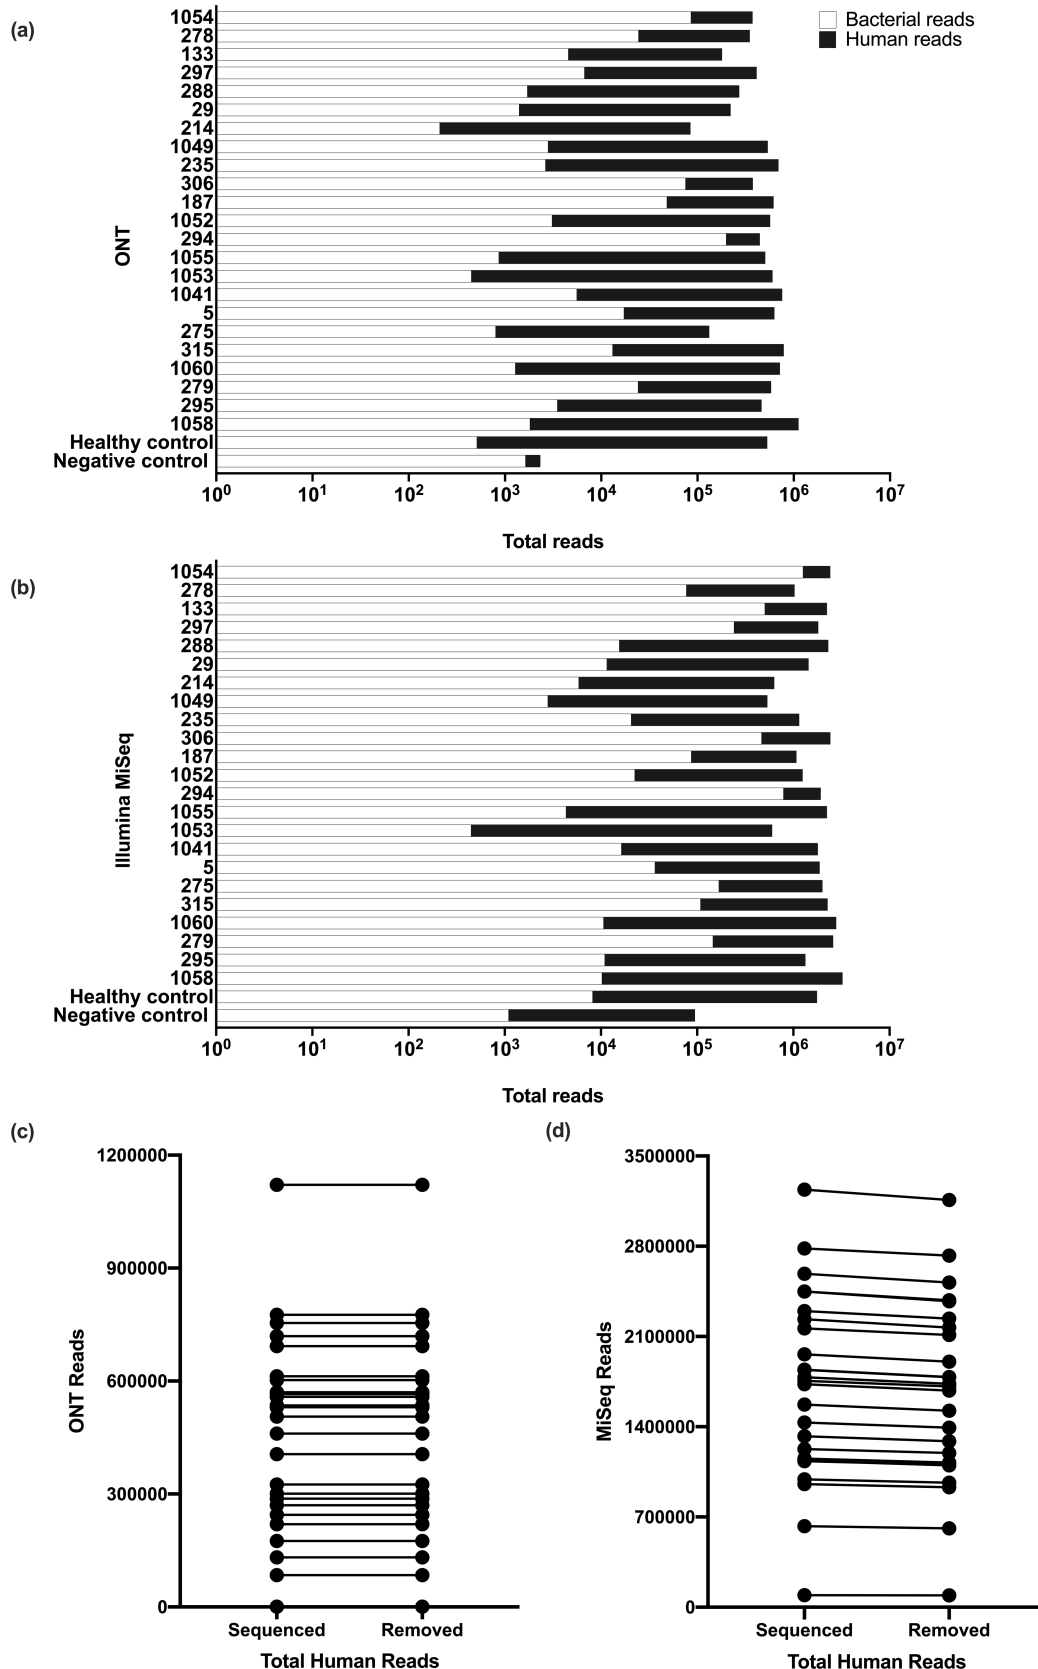

**Table S3:** Mapping coverage statistics of consensus fasta sequences; 4 clinical samples positive for *H. influenzae* (PID: 278, 133, 29, 288) and each corresponding bacterial isolate (*H.inf\_278*, *H.inf\_133*, *H.inf\_29*, *H.inf\_288*) are shown

| <b>Sample</b> | <b>As</b> | <b>Cs</b> | <b>Gs</b> | <b>Ns</b> | <b>Ts</b> | <b>Bases covered</b> | <b>% Covered</b> | <b>Length (bp)</b> |
|---------------|-----------|-----------|-----------|-----------|-----------|----------------------|------------------|--------------------|
| PID 278       | 521515    | 317255    | 314865    | 157459    | 519044    | 1672679              | 91.4             | 1830138            |
| H. inf_278    | 521365    | 321867    | 318231    | 149113    | 519562    | 1681025              | 91.9             | 1830138            |
| PID 133       | 308467    | 184702    | 184786    | 846122    | 306061    | 984016               | 53.8             | 1830138            |
| H. inf_133    | 521055    | 321265    | 318636    | 149903    | 519279    | 1680235              | 91.8             | 1830138            |
| PID29         | 741       | 532       | 471       | 1827537   | 857       | 2601                 | 0.1              | 1830138            |
| H. inf_29     | 528329    | 325443    | 322892    | 126355    | 527119    | 1703783              | 93.1             | 1830138            |
| PID 288       | 7581      | 4800      | 4415      | 1805539   | 7803      | 24599                | 1.3              | 1830138            |
| H. inf_288    | 524167    | 323136    | 319242    | 141942    | 521651    | 1688196              | 92.2             | 1830138            |
